# Supplementary material for: Wet-Chemical Synthesis of 3D Stacked Thin Film Metal-Oxides for All-Solid-State Li-Ion Batteries
Source: MDPI journal article supplement (doi:10.3390/ma10091072), 2017-09-12
Supplement: s1 [file s1]

## Supplementary Materials

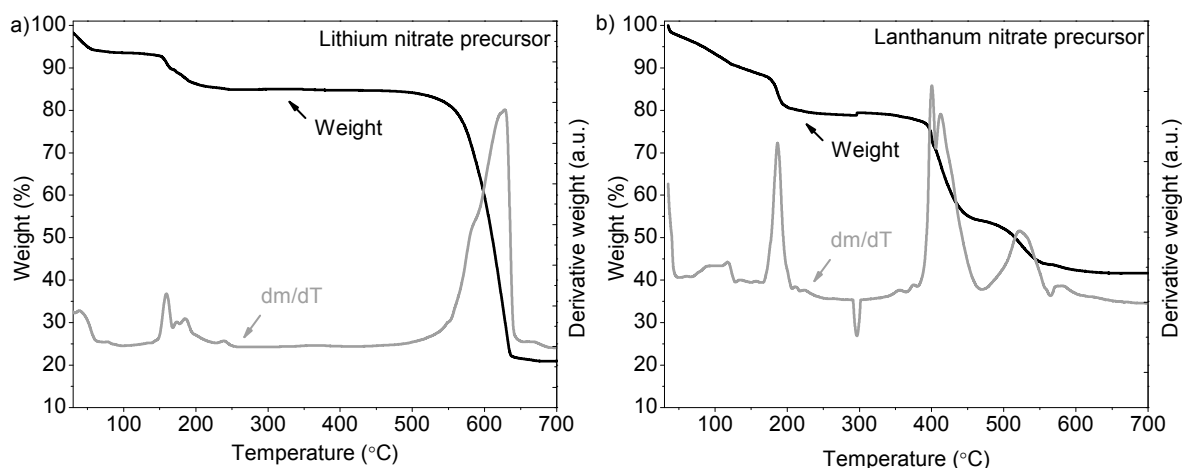

**Figure S1.** TGA analysis of (a) the lithium nitrate precursor and (b) lanthanum nitrate precursor dried at 60 °C, recorded at 10 °C·min<sup>-1</sup> in dry air (0.1 ml·min<sup>-1</sup>).

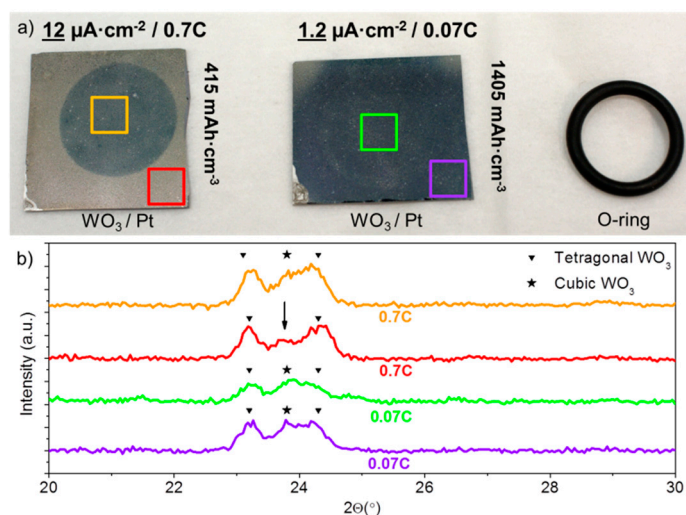

**Figure S2.** Comparison between WO<sub>3</sub> coated (10 cycles, 25 mM) Pt samples after a single lithiation down to 2.0 V vs Li<sup>+</sup>/Li, at high and low current density. (a) Photograph of the samples and O-ring used in the electrochemical cell, showing dark blue coloration of lithiated areas. The colored squares relate to (b), showing XRD on isolated parts after cutting the samples.

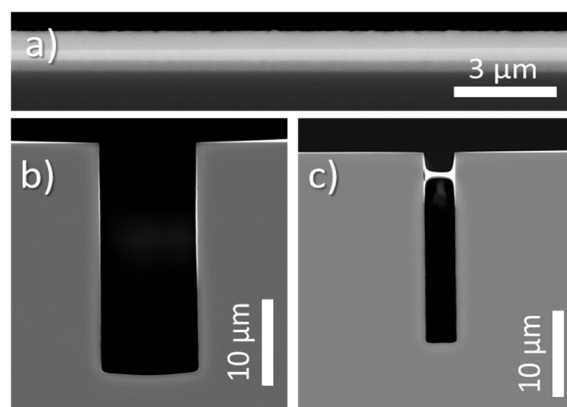

**Figure S3.** SEM micrograph showing backscattered (BSE) image of 10 cycles of W-precursor deposition on a (a) planar Si substrate, (b) trench of 10 by 27 μm and (c) trench of 3.5 by 22.5 μm, all annealed at 500 °C for 10 min in static air.

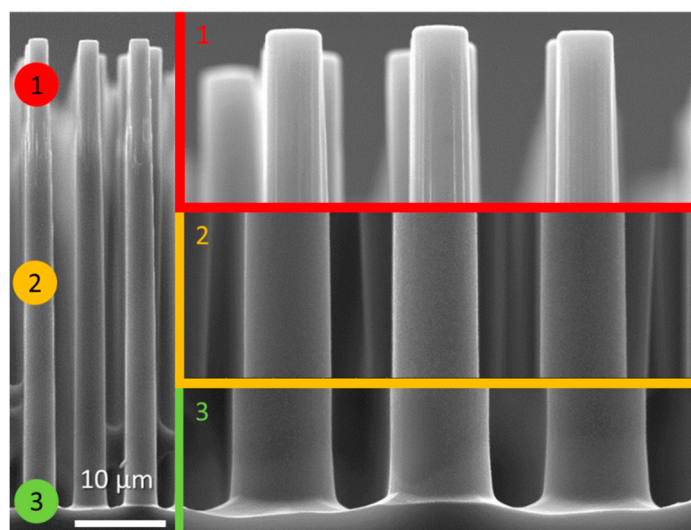

**Figure S4.** SEM micrograph of 10 cycles of W-precursor deposition at 180 °C on 50 μm high micro-cylinders, with an average diameter of 2.5 μm, with 5 μm inter-cylinder spacing. The sample was annealed at 500 °C for 10 min in static air.

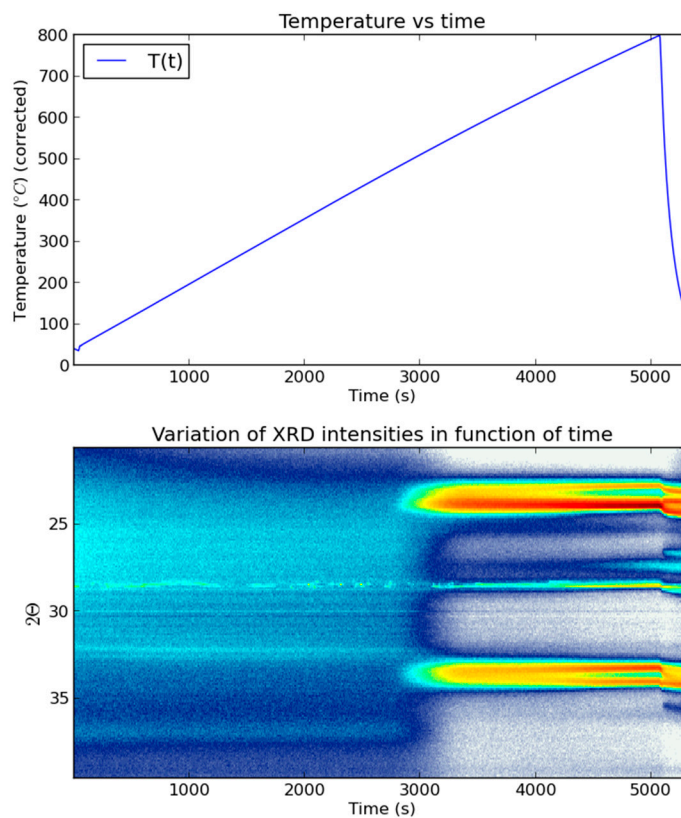

**Figure S5.** In-situ XRD results showing applied temperature profile (top), as well as (bottom) diffraction intensity as function of peak position and time. Both graphs are based on the same sample; W-citrate deposited using 10 cycles on TiN micro-cylinders at a deposition temperature of 180 °C.
